# Supplementary material
Source: PubMed Central journal article supplement (PMC2536739)
Supplement: 90425.2008_1.pdf [file 90425.2008_1.pdf]

## Online supplement

Table 1s. Hemodynamic and arterial blood gas data in conscious rabbits from each group.

|                           | normoxia              | mild hypoxia          | severe hypoxia        |
|---------------------------|-----------------------|-----------------------|-----------------------|
| MBP (mm Hg)               |                       |                       |                       |
| SED-Sham                  | 82.4 ± 1.9            | 79.5 ± 2.3            | 80.9 ± 2.5            |
| EXT-Sham                  | 81.8 ± 2.6            | 79.6 ± 2.1            | 80.4 ± 2.4            |
| SED-CHF                   | 75.3 ± 2.3*           | 75.1 ± 2.5*           | 74.9 ± 2.7*           |
| EXT-CHF                   | 74.8 ± 2.4*           | 74.4 ± 2.1*           | 74.2 ± 2.3*           |
| HR (bpm)                  |                       |                       |                       |
| SED-Sham                  | 237 ± 9               | 241 ± 12              | 244 ± 11              |
| EXT-Sham                  | 226 ± 11              | 228 ± 12              | 231 ± 13              |
| SED-CHF                   | 276 ± 9*              | 279 ± 8*              | 284 ± 12*             |
| EXT-CHF                   | 241 ± 12 <sup>#</sup> | 243 ± 13 <sup>#</sup> | 245 ± 10 <sup>#</sup> |
| PaO <sub>2</sub> (mm Hg)  |                       |                       |                       |
| SED-Sham                  | 90.8 ± 1.8            | 60.5 ± 2.5            | 42.0 ± 1.0            |
| EXT-Sham                  | 90.2 ± 1.9            | 61.1 ± 2.1            | 40.7 ± 1.8            |
| SED-CHF                   | 91.0 ± 2.0            | 59.5 ± 2.5            | 43.0 ± 2.0            |
| EXT-CHF                   | 90.6 ± 2.3            | 60.4 ± 2.5            | 41.2 ± 2.7            |
| PaCO <sub>2</sub> (mm Hg) |                       |                       |                       |
| SED-Sham                  | 36.5 ± 1.4            | 35.9 ± 1.6            | 35.2 ± 1.5            |
| EXT-Sham                  | 36.1 ± 1.5            | 35.3 ± 1.6            | 34.9 ± 1.6            |
| SED-CHF                   | 37.4 ± 1.8            | 36.1 ± 1.9            | 35.5 ± 1.8            |
| EXT-CHF                   | 36.9 ± 1.6            | 35.7 ± 2.0            | 35.4 ± 1.8            |
| pH                        |                       |                       |                       |
| SED-Sham                  | 7.44 ± 0.01           | 7.42 ± 0.01           | 7.38 ± 0.01           |
| EXT-Sham                  | 7.43 ± 0.01           | 7.43 ± 0.01           | 7.41 ± 0.01           |
| SED-CHF                   | 7.42 ± 0.01           | 7.41 ± 0.01           | 7.41 ± 0.01           |
| EXT-CHF                   | 7.44 ± 0.01           | 7.41 ± 0.01           | 7.41 ± 0.01           |

Data are means ± SE. n=8 in each group. MBP: mean blood pressure; HR: heart rate. \*P<0.05 vs SED-Sham; <sup>#</sup>p<0.05 vs SED-CHF.

Table 2s. Gas/pH data in perfused solution in isolated CB preparations from each group.

|                          | normoxia    | mild hypoxia | severe hypoxia |
|--------------------------|-------------|--------------|----------------|
| PO <sub>2</sub> (mm Hg)  |             |              |                |
| SED-Sham                 | 103.2 ± 2.1 | 60.9 ± 1.9   | 41.4 ± 1.8     |
| EXT-Sham                 | 103.8 ± 2.2 | 59.7 ± 1.7   | 40.8 ± 1.4     |
| SED-CHF                  | 102.9 ± 2.0 | 61.1 ± 1.9   | 42.2 ± 1.4     |
| EXT-CHF                  | 103.5 ± 2.2 | 60.6 ± 1.6   | 41.7 ± 1.5     |
| PCO <sub>2</sub> (mm Hg) |             |              |                |
| SED-Sham                 | 32.9 ± 0.5  | 32.3 ± 0.4   | 32.4 ± 0.5     |
| EXT-Sham                 | 33.3 ± 0.6  | 32.6 ± 0.5   | 32.5 ± 0.4     |
| SED-CHF                  | 32.1 ± 0.5  | 31.9 ± 0.6   | 31.2 ± 0.5     |
| EXT-CHF                  | 32.7 ± 0.6  | 32.2 ± 0.3   | 31.7 ± 0.4     |
| pH                       |             |              |                |
| SED-Sham                 | 7.41 ± 0.01 | 7.40 ± 0.01  | 7.40 ± 0.01    |
| EXT-Sham                 | 7.42 ± 0.01 | 7.42 ± 0.01  | 7.41 ± 0.01    |
| SED-CHF                  | 7.40 ± 0.01 | 7.39 ± 0.01  | 7.40 ± 0.01    |
| EXT-CHF                  | 7.42 ± 0.01 | 7.41 ± 0.01  | 7.40 ± 0.01    |

Data are means ± SE. n=8 in each group. MBP: mean blood pressure; HR: heart rate. \*P<0.05 vs SED-Sham; #p<0.05 vs SED-CHF.
